# Supplementary material for: A fluorescent sensor to detect lead leakage from perovskite solar cells
Source: Royal Society of Chemistry journal article supplement (doi:10.1039/d3ma00068k), 2023-01-01
Supplement: d3ma00068k1.pdf [file d3ma00068k1.pdf]

## SUPPORTING INFORMATION

$$\Phi = \frac{(\Phi_b * I_s * A_b * \lambda_{exb} * \eta_s)}{(I_b * A_s * \lambda_{exs} * \eta_b)}$$

SI 1 Fluorescence quantum yield equation.  $I_s$  and  $I_b$  are, respectively, the integrated area under the emission spectra of sample and standard;  $A_s$  and  $A_b$  are the absorbance at the excitation wavelength of sample and standard;  $\lambda_{ex}$  is the excitation wavelength;  $\eta$  is the refractive index of the sample and standard solutions;  $\Phi_b$  is the fluorescence quantum yield of the standard.

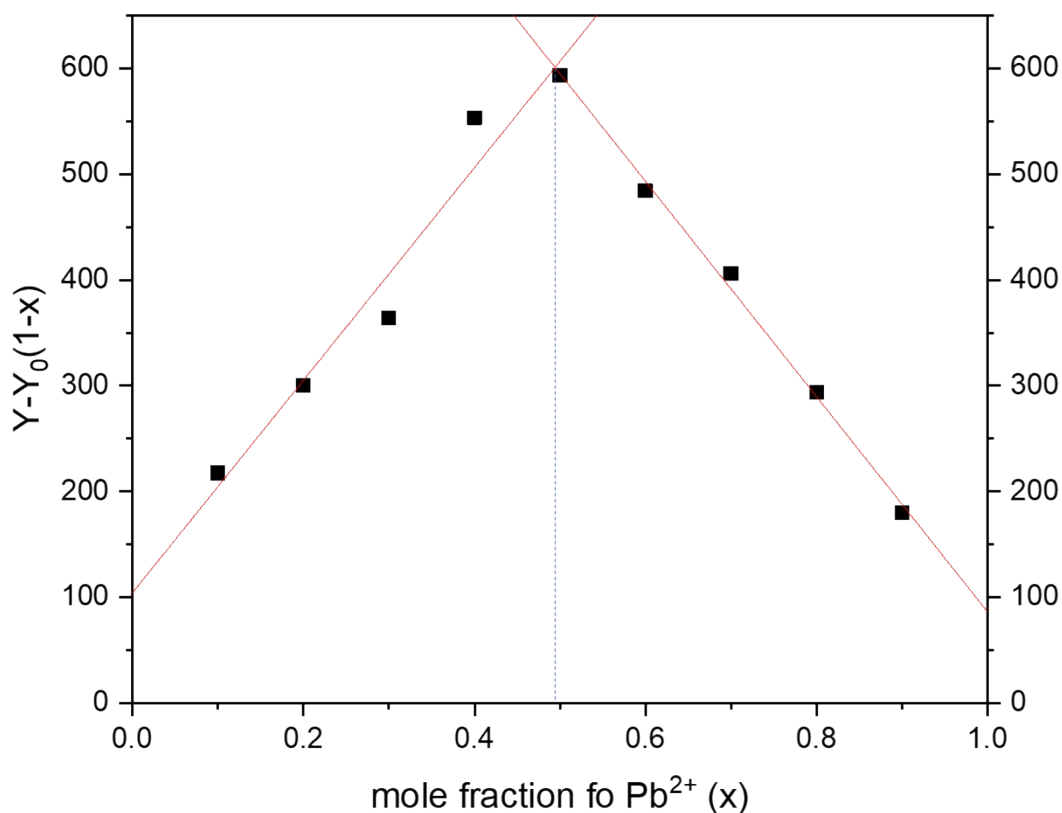

SI 2 Job's plot of fluorescence intensity vs  $\text{Pb}^{2+}$  molar fraction. Total concentration of  $\text{Pb}^{2+}$  and FS is  $10^{-5}$  M, in acid aqueous solution pH4.5 in PBS 0.1M.

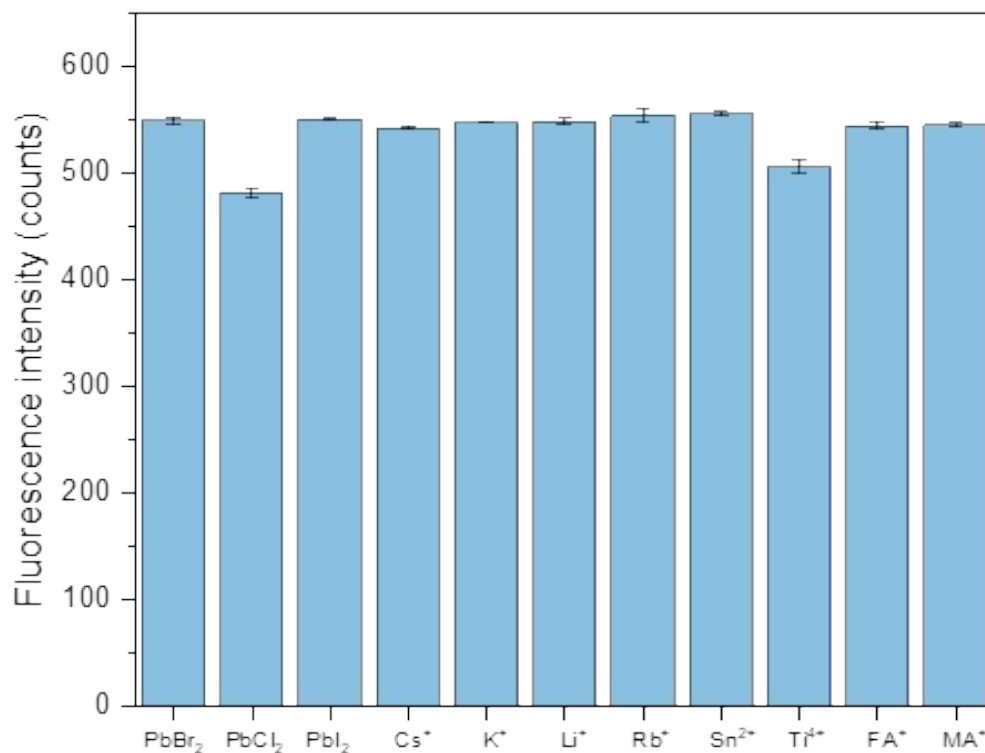

SI 3 Fluorescence intensity of solutions at pH 4.5 in 0.1M PBS and  $5.5 \mu\text{M}$  sensor in the presence of 2 eq of  $\text{PbI}_2$  and 15 eq of cation salts present in perovskite cells. Fluorescence intensity of solutions at pH 4.5 in 0.1M PBS and  $5.5 \mu\text{M}$  sensor in the presence of 2 equivalents of  $\text{PbI}_2$ ,  $\text{PbCl}_2$ , and  $\text{PbBr}_2$  (10% HCl).

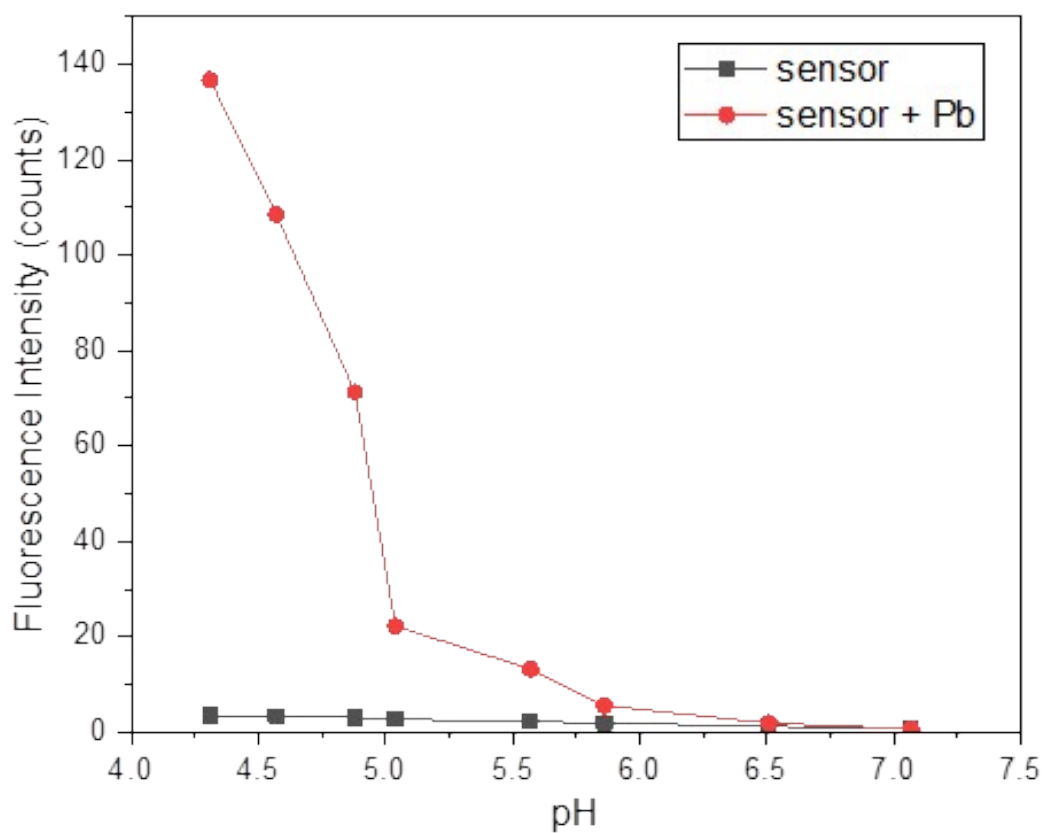

SI 4 Fluorimetric titration ( $\lambda_{\text{ex}} = 470 \text{ nm}$ ) in PBS 0.1M at variable pH of [FS] 0.5  $\mu\text{M}$  in the absence (black line) and in the presence of 2 eq of  $\text{Pb}^{2+}$  (red line).

| $y = a + b * x$ |                        |
|-----------------|------------------------|
|                 | B                      |
| Pearson's r     | 0.99963                |
| Adj. R-Square   | 0.99921                |
| Intercept       | $36.23407 \pm 1.76745$ |
| Slope           | $231.01897 \pm 1.6763$ |

SI 5 Parameters obtained from the linear fit for the calibration line.

| Time (min) | H <sub>2</sub> O-TFA % | CH <sub>3</sub> CN % | Time (min) | H <sub>2</sub> O-TFA % | CH <sub>3</sub> CN % |
|------------|------------------------|----------------------|------------|------------------------|----------------------|
| 0          | 95                     | 5                    | 0          | 95                     | 5                    |
| 2          | 95                     | 5                    | 2          | 95                     | 5                    |
| 10         | 30                     | 70                   | 11         | 42                     | 58                   |
| 14         | 0                      | 100                  | 12         | 42                     | 58                   |
| 17         | 95                     | 5                    | 14         | 0                      | 100                  |
|            |                        |                      | 16         | 0                      | 100                  |
|            |                        |                      | 18         | 95                     | 5                    |
|            |                        |                      | 21         | 95                     | 5                    |

Table SI 6 gradient use for the preparative HPLC (left) and analytical HPLC (right).

# $^1\text{H}$ and $^{13}\text{C}$ -NMR Characterization

Compound 2.  $^1\text{H}$ -NMR ( $\text{CDCl}_3$ , 300 MHz)

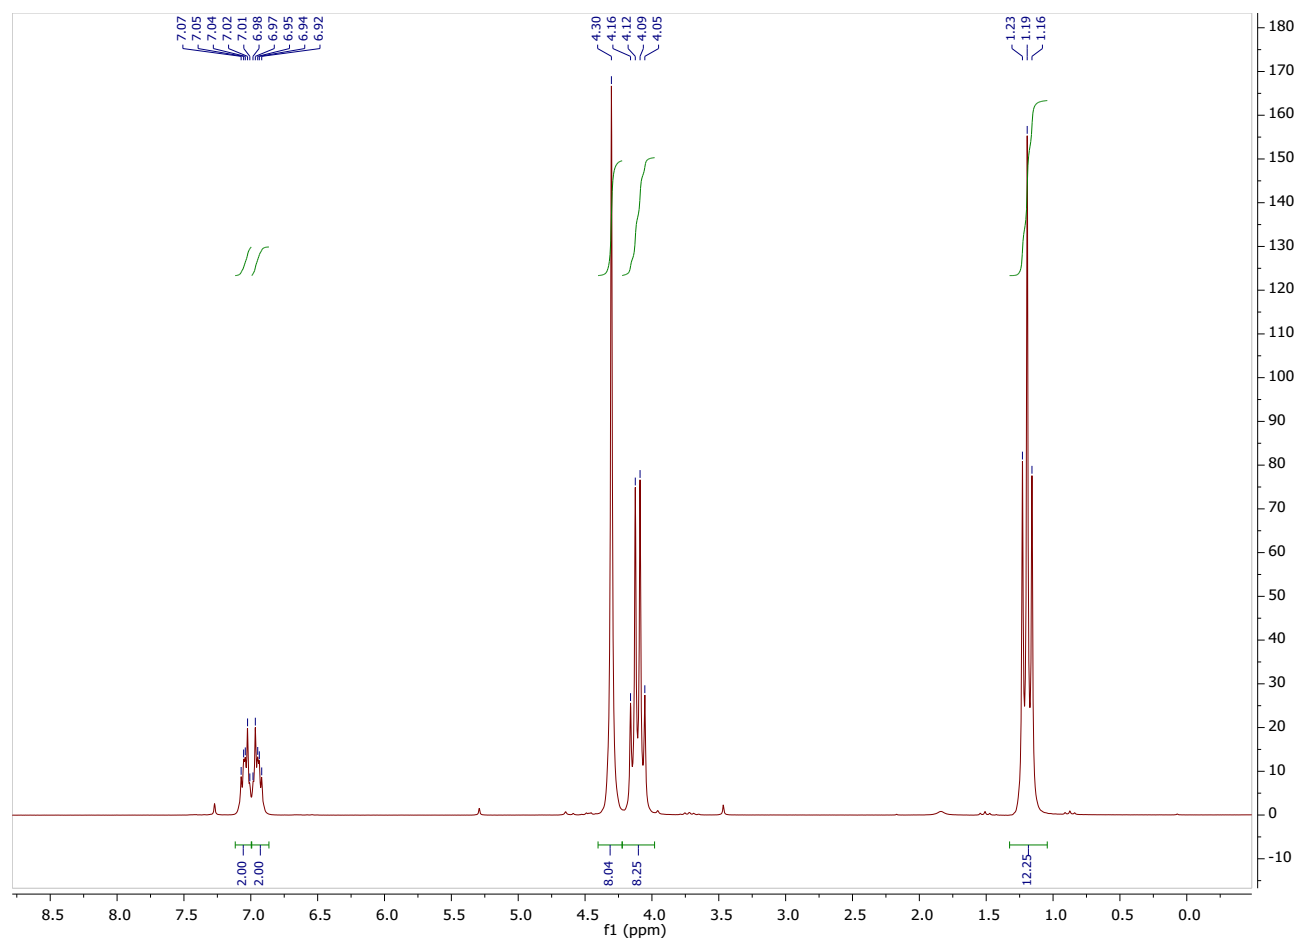

Compound 3.  $^1\text{H-NMR}$  ( $\text{CDCl}_3$ , 300 MHz)

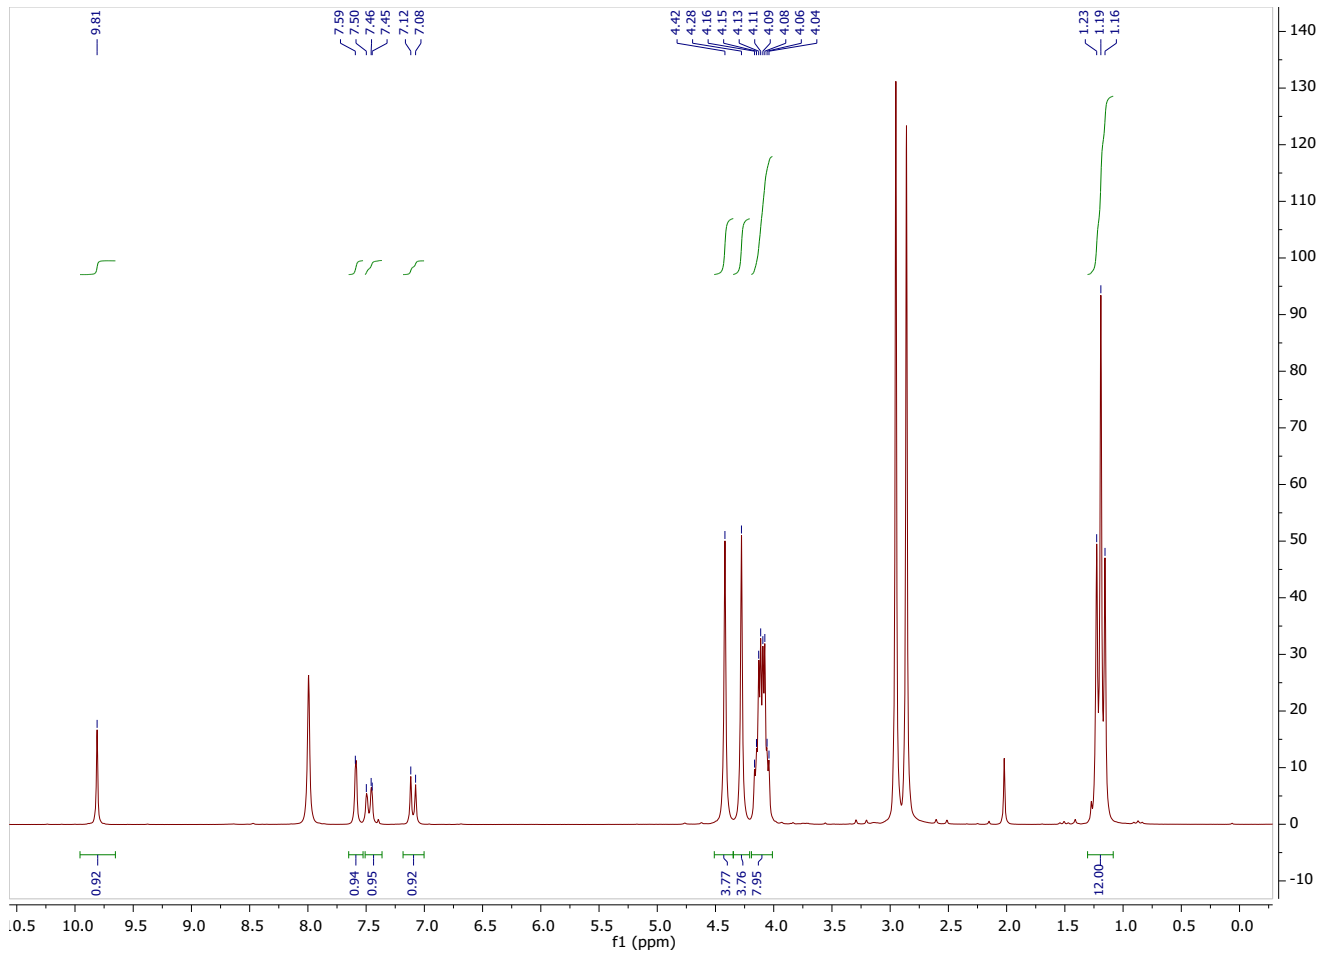

Compound 4. <sup>1</sup>H-NMR (CDCl<sub>3</sub>, 300 MHz)

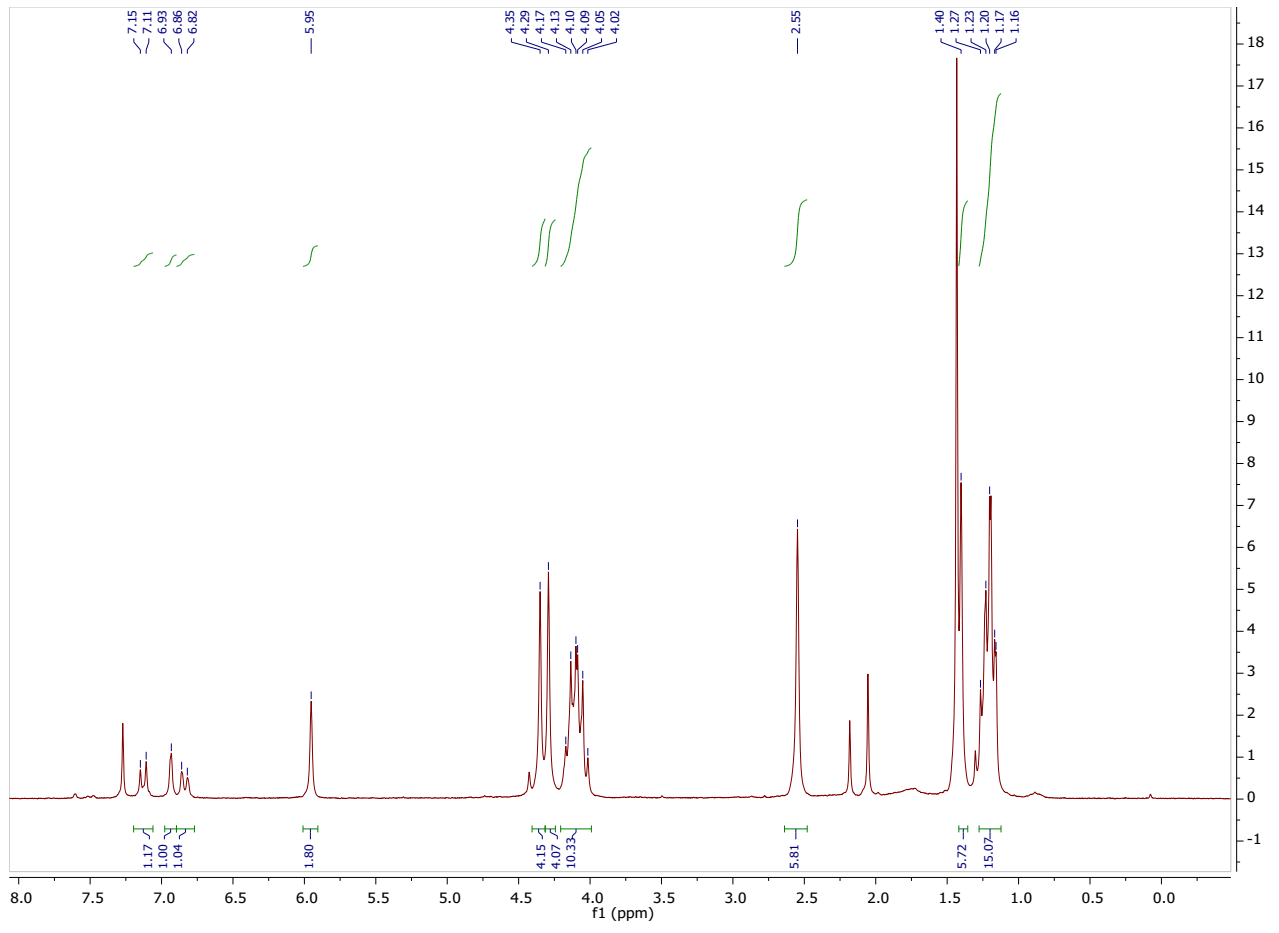

Compound 5. <sup>1</sup>H-NMR (D<sub>2</sub>O, 400 MHz)

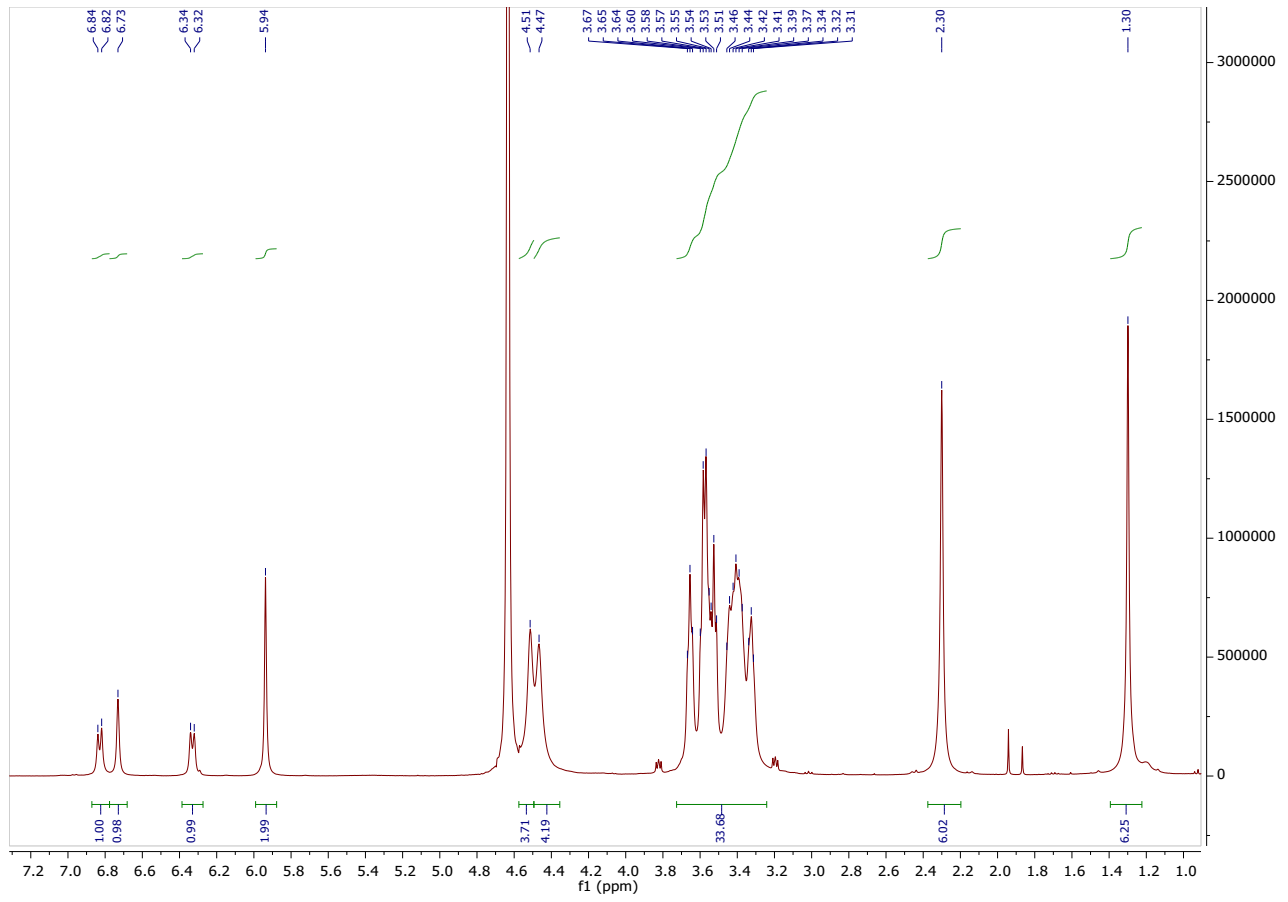



Compound 5.  $^{13}\text{C}$ -NMR ( $\text{D}_2\text{O}$ , 100 MHz)

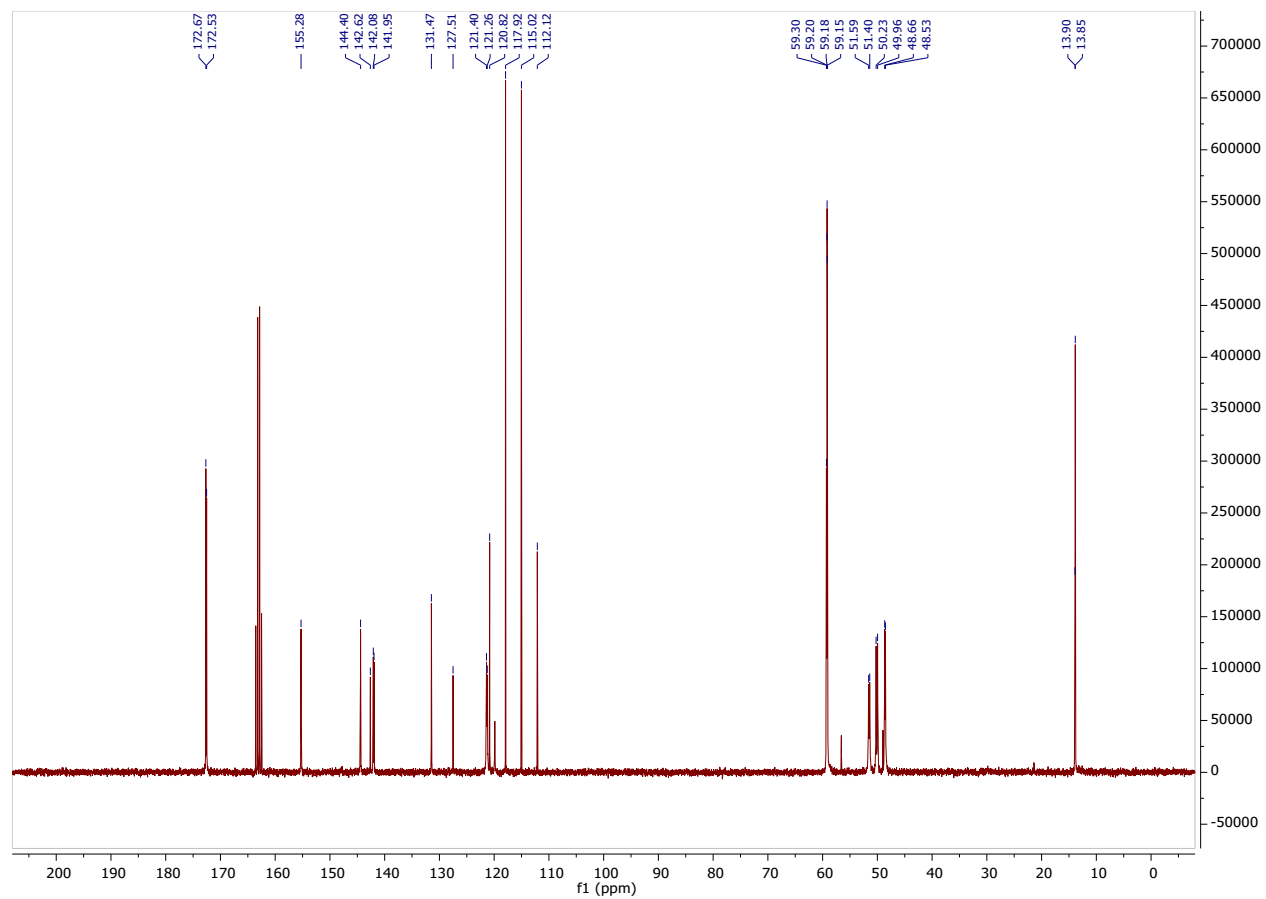

## ESI-MS Analysis.

Compound 5.(ESI-MS, Positive mode): mass calculated for 5 [M+Na]<sup>+</sup> requires  $m/z = 957.49$ , found  $m/z = 957.58$ .

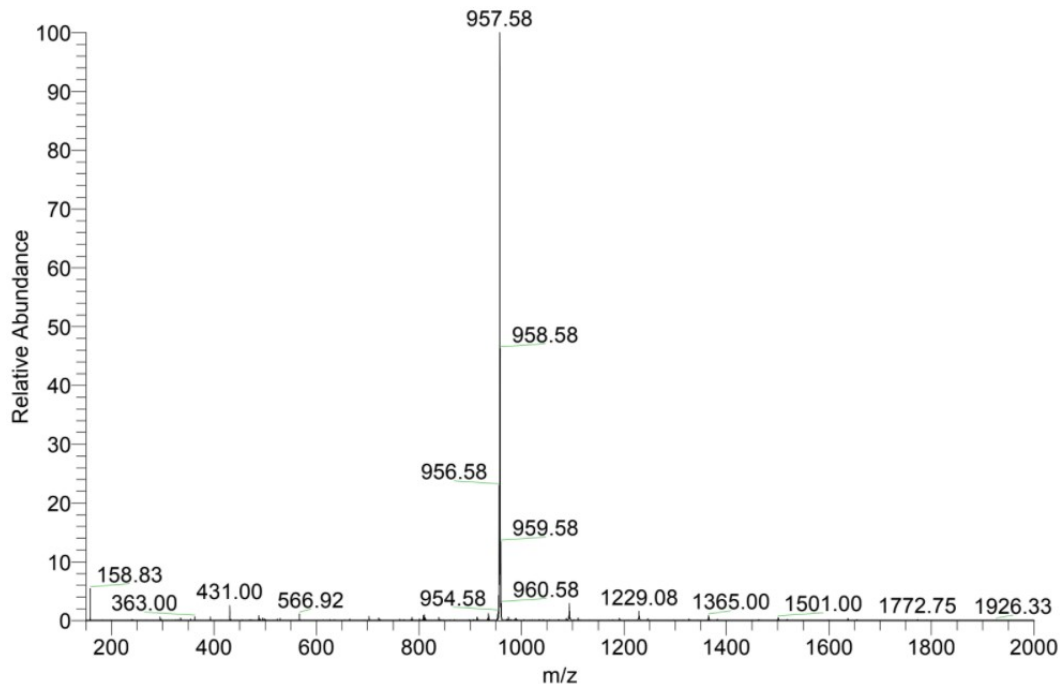

## HPLC Characterization.

Compound 5. Retention time 8.292 min; purity 98.32%.

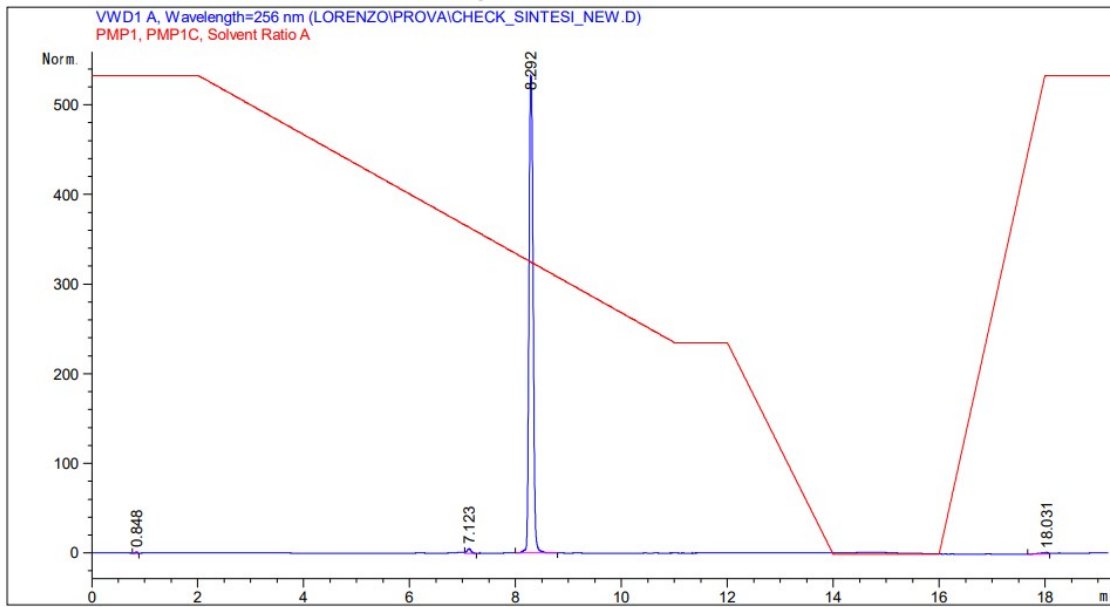

| Peak # | RetTime [min] | Type | Width [min] | Area [mAU*s] | Height [mAU] | Area %  |
|--------|---------------|------|-------------|--------------|--------------|---------|
| 1      | 0.848         | BB   | 0.0394      | 4.69051      | 1.74166      | 0.1597  |
| 2      | 7.123         | VB   | 0.0817      | 25.24445     | 4.85179      | 0.8596  |
| 3      | 8.292         | BB   | 0.0872      | 2887.42578   | 532.76715    | 98.3169 |
| 4      | 18.031        | BV   | 0.1321      | 19.49534     | 1.82485      | 0.6638  |
